# Supplementary material
Source: Springer Nature journal article supplement (https://www.springermedizin.de/resource/supplementary/13019_2009_214_MOESM2_ESM.pdf/9638090)

x10<sup>3</sup>/μl

# WBCs

16,00

14,00

12,00

10,00

8,00

6,00

4,00

2,00

0,00

1

2

3

4

5

6

7

8

9

10

11

12

13

14

15

16

17

18

◆ phase 1

■ phase 7

▲ phase 8

GROUP: I (1-6), II (7-12), III (13-18)

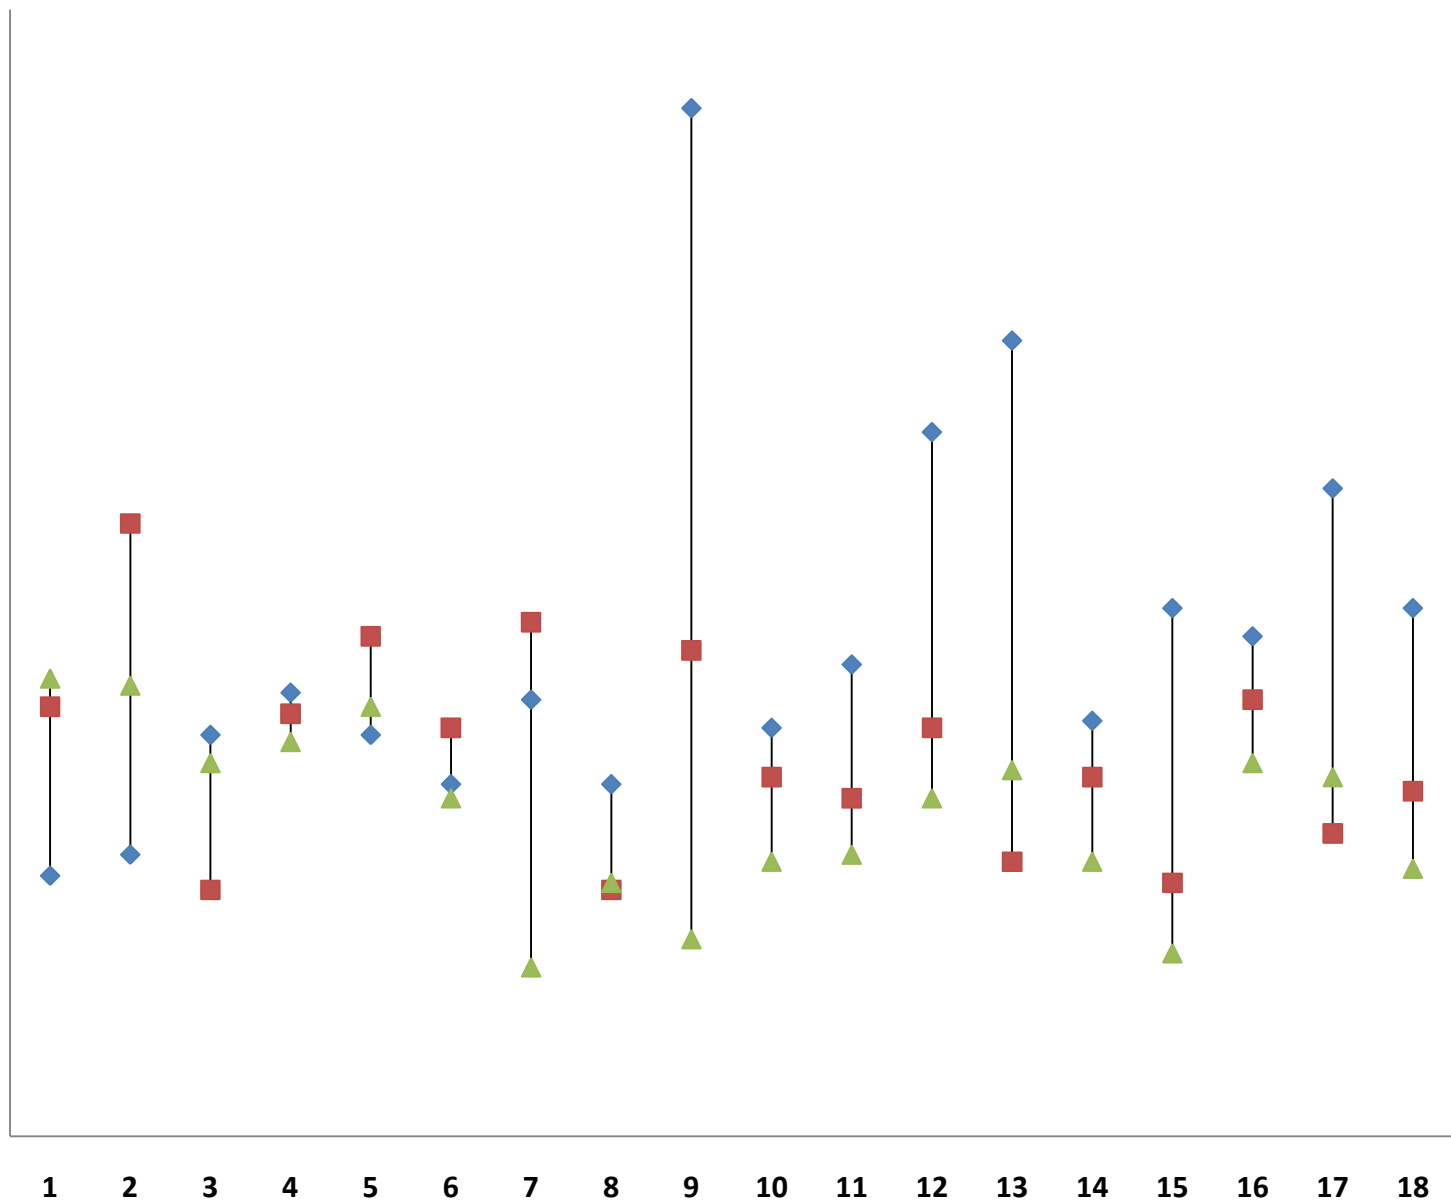

Supplement: MOESM2 [file 9638090]
